# Supplementary material for: Available Bleeding Scoring Systems Poorly Predict Major Bleeding in the Acute Phase of Pulmonary Embolism
Source: MDPI journal article supplement (doi:10.3390/jcm10163615), 2021-08-16
Supplement: s1 [file s1]

## Supplementary material

**Table S1.** ORBIT, HAEMORR<sup>2</sup>HAGES, ATRIA, HAS-BLED, VTE-BLEED, and RIETE scores, and staging systems for risk of major bleeding complications [1-5].

| <b>ORBIT score</b>                                                                               | <b>Points</b> |
|--------------------------------------------------------------------------------------------------|---------------|
| Age > 74 years                                                                                   | +1            |
| Bleeding history (i.e. Any history of GI bleeding, intracranial bleeding, or hemorrhagic stroke) | +2            |
| GFR <60 mL/min/1.73 m <sup>2</sup>                                                               | +1            |
| Treatment with antiplatelet agents                                                               | +1            |
| <b>HEMORR<sup>2</sup>HAGES score</b>                                                             | <b>points</b> |
| Hepatic or Renal Disease                                                                         | +1            |
| Ethanol (Alcohol) Abuse                                                                          | <b>+1</b>     |
| Age > 75 years                                                                                   | +1            |
| Reduced Platelet Count or Function                                                               |               |
| Includes aspirin use, any thrombocytopenia or blood dyscrasia, like hemophilia                   | +1            |
| History of past bleeding                                                                         | +2            |
| Hypertension (uncontrolled)                                                                      | +1            |
| Anemia                                                                                           |               |
| Hb <13 g/dL for Men; Hb <12 g/dL for Women                                                       | +1            |
| Genetic Factors                                                                                  |               |
| CYP 2C9 single-nucleotide polymorphisms                                                          | +1            |
| Excessive fall risk                                                                              | +1            |
| Stroke history                                                                                   | +1            |
| <b>ATRIA score</b>                                                                               | <b>Points</b> |
| Anemia                                                                                           |               |
| Hb <13 g/dL (Male), <12 g/dL (Female)                                                            | +3            |
| Severe Renal Disease                                                                             |               |
| Glomerular filtration rate <30 mL/min or dialysis-dependent                                      | +3            |
| Age > 74 years                                                                                   | +2            |
| Any Prior Hemorrhage Diagnosis (e.g. GI bleed, intracranial hemorrhage)                          | +1            |
| Hypertension history                                                                             | +1            |
| <b>HAS-BLED score</b>                                                                            | <b>Points</b> |
| Hypertension                                                                                     |               |
| Uncontrolled, >160 mmHg systolic                                                                 | +1            |
| Renal disease                                                                                    |               |
| Dialysis, transplant, Cr >2.26 mg/dL or >200 µmol/L                                              | +1            |
| Liver disease                                                                                    |               |
| Cirrhosis or bilirubin >2x normal with AST/ALT >3x normal                                        | +1            |
| Stroke history                                                                                   | +1            |
| Prior major bleeding or predisposition to bleeding                                               | +1            |

|                                                                           |               |
|---------------------------------------------------------------------------|---------------|
| Labile INR                                                                |               |
| Unstable/high INRs, time in therapeutic range <60%                        | +1            |
| Age > 65 years                                                            | +1            |
| Medication usage predisposing to bleeding<br>Aspirin, clopidogrel, NSAIDs | +1            |
| Alcohol use<br>≥8 drinks/week                                             | +1            |
| <b>VTE-BLEED score</b>                                                    | <b>Points</b> |
| Active cancer                                                             | + 2           |
| Male Patient with Uncontrolled Hypertension<br>[Systolic BP ≥140mm Hg]    | +1            |
| Anemia<br>[Hb <130g/L Men. Hb <120g/L Women]                              | + 1.5         |
| History of Bleeding<br>[Major or non-major clinically relevant bleeding]  | + 1.5         |
| Renal Dysfunction<br>[CrCl 30-60 ml/min]                                  | + 1.5         |
| Age ≥60 years                                                             | + 1.5         |
| <b>RIETE score</b>                                                        | <b>Points</b> |
| Recent Major Bleeding                                                     | + 2           |
| Malignancy                                                                | + 1           |
| Anaemia<br>[Hb <130g/L Men. Hb <120g/L Women]                             | + 1.5         |
| Renal Dysfunction<br>[Creatinine <1.2 mg/dL]                              | + 1.5         |
| Clinically overt PE                                                       | +1            |
| Age >75 yrs                                                               | + 1           |

ORBIT score: Points are assigned for the presence of each variable. The sum of the variable points produces the total point score (ORBIT score; range, 0-7). ORBIT risk staging increased with point totals: low-risk (< 2 points), intermediate-risk (3 point), and high-risk (4-7 points). HEMORR<sup>2</sup>HAGES score: Points are assigned for the presence of each variable. The sum of the variable points produces the total point score (HEMORR<sup>2</sup>HAGES score; range, 0-12). ORBIT risk staging increased with point totals: low-risk (< 2 points), intermediate-risk (3 point), and high-risk (4-7 points). Atria score: Points are assigned for the presence of each variable. The sum of the variable points produces the total point score (Atria score; range, 0-10). Atria risk staging increased with point totals: low-risk (< 4 points), intermediate-risk (4 point), and high-risk (> 4 points). HAS-BLED score: Points are assigned for the presence of each variable. The sum of the variable points produces the total point score (HAS-BLED score; range, 0-9). HAS-BLED risk staging increased with point totals: relatively low-risk (0-1 points), intermediate-risk (3 point), and high-risk (> 3 points). VTEBLEED score: Points are assigned for the presence of each variable. The sum of the variable points produces the total point score (VTE-BLEED score; range, 0-9). VTE-BLEED risk staging increased with point totals: low-risk (0-1points), intermediate-risk (2, 3 points) or high-risk (≥ 3 points). RIETE score: Points are assigned for the presence of each variable. The sum of the variable points produces the total point score (RIETE risk score; range, 0-8). RIETE risk staging increased with point totals: low-risk (0 points), intermediate-risk (1-4 points), or high-risk (>4 points). Abbreviations: GI, gastro-intestinal; Hb, hemoglobin; CR, creatinine; AST, Aspartate aminotransférase ; ALT, Alanine aminotransférase ; INR, international

normalized ratio; NSAIDs, Non-steroidal anti-inflammatory drugs ; CrCl, creatinine clearance; PE, pulmonary embolism.

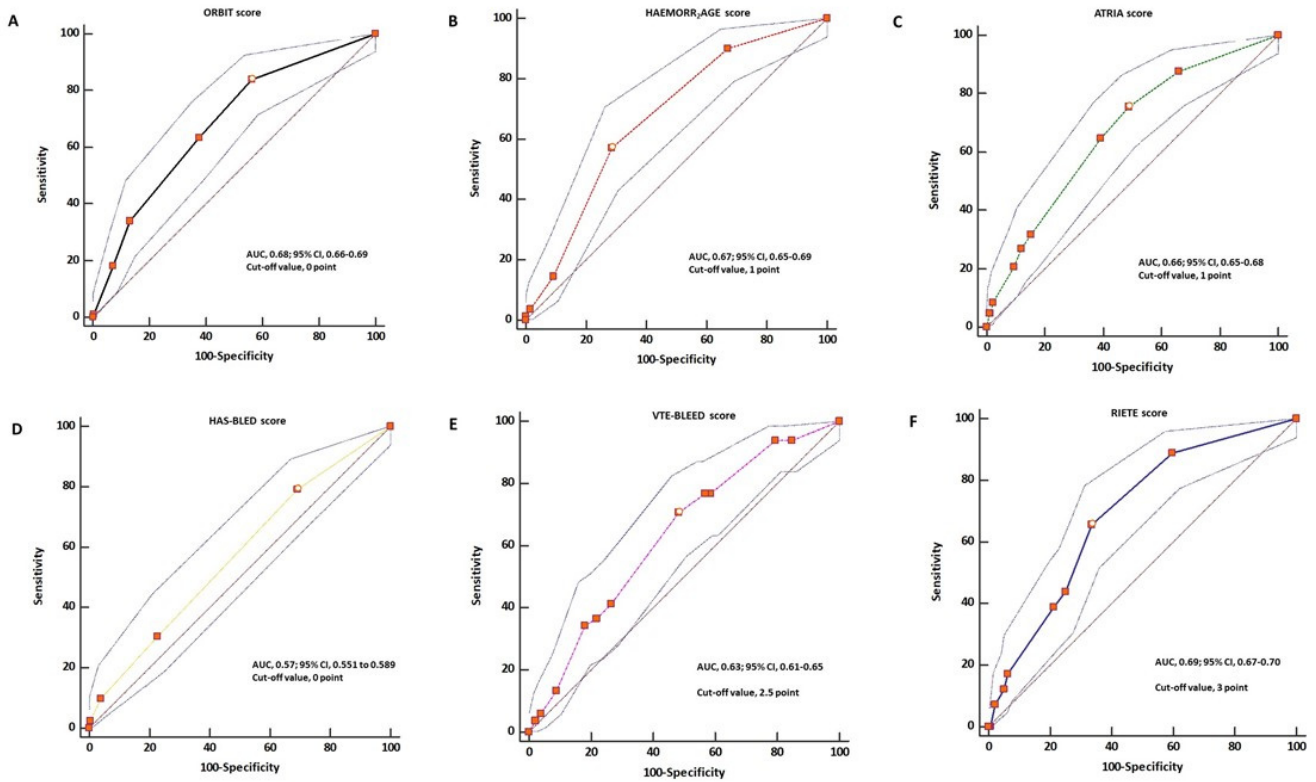

**Figure S1:** Receiving operative curve assessment for dichotomy isolation of the bleeding risk scores (A, ORBIT score; B, HAEMORR<sub>2</sub>AGE score; C, ATRIA score; D, HAS-BLED score; E, VTE-BLEED score, and F, RIETE score). ORBIT score: Points are assigned for the presence of each variable. The sum of the variable points produces the total point score (ORBIT score; range, 0-7). ORBIT risk staging increased with point totals: low-risk (< 2 points), intermediate-risk (3 point), and high-risk (4-7 points). HEMORR<sub>2</sub>HAGES score: Points are assigned for the presence of each variable. The sum of the variable points produces the total point score (HEMORR<sub>2</sub>HAGES score; range, 0-12). ORBIT risk staging increased with point totals: low-risk (< 2 points), intermediate-risk (3 point), and high-risk (4-7 points). Atria score: Points are assigned for the presence of each variable. The sum of the variable points produces the total point score (Atria score; range, 0-10). Atria risk staging increased with point totals: low-risk (< 4 points), intermediate-risk (4 point), and high-risk (> 4 points). HAS-BLED score: Points are assigned for the presence of each variable. The sum of the variable points produces the total point score (HAS-BLED score; range, 0-9). HAS-BLED risk staging increased with point totals: relatively low-risk (0-1 points), intermediate-risk (3 point), and high-risk (> 3 points). VTEBLEED score: Points are assigned for the presence of each variable. The sum of the variable points produces the total point score (VTE-BLEED score; range, 0-9). VTE-BLEED risk staging increased with point totals: low-risk (0-1points), intermediate-risk (2, 3 points) or high-risk (≥ 3 points). RIETE score: Points are assigned for the presence of each variable. The sum of the variable points produces the total point score (RIETE risk score; range, 0-8). RIETE risk staging increased with point totals: low-risk (0 points), intermediate-risk (1-4 points), or high-risk (>4 points).

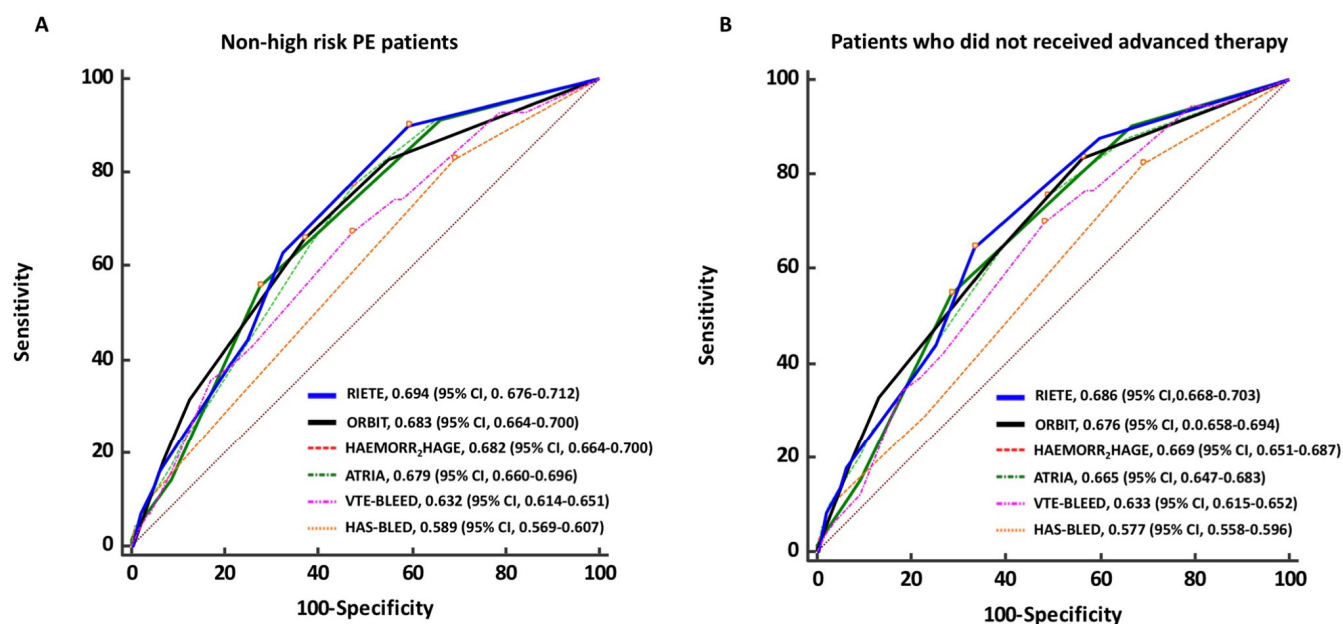

**Figure S2.** Sensitivity analysis with receiving operative curves, and the corresponding C-indices of bleeding risk scores (i.e. ORBIT, HAEMORR<sub>2</sub>AGE, ATRIA, HAS-BLED, VTE-BLEED, and RIETE scores) in non-high-risk PE patients ( $n = 2,621$ ) (A) and in patient who did not received advanced therapy ( $n=2,634$ ) (B). PE: pulmonary embolism.

## References

1. Ruiz-Gimenez, N.; Suarez, C.; Gonzalez, R.; Nieto, J.A.; Todoli, J.A.; Samperiz, A.L.; Monreal, M.; Investigators, R. Predictive variables for major bleeding events in patients presenting with documented acute venous thromboembolism. Findings from the RIETE Registry. *Thromb Haemost* **2008**, *100*, 26–31, doi:10.1160/TH08-03-0193.
2. Klok, F.A.; Hosel, V.; Clemens, A.; Yollo, W.D.; Tilke, C.; Schulman, S.; Lankeit, M.; Konstantinides, S.V. Prediction of bleeding events in patients with venous thromboembolism on stable anticoagulation treatment. *Eur Respir J* **2016**, *48*, 1369-1376, doi:10.1183/13993003.00280-2016.
3. O'Brien, E.C.; Simon, D.N.; Thomas, L.E.; Hylek, E.M.; Gersh, B.J.; Ansell, J.E.; Kowey, P.R.; Mahaffey, K.W.; Chang, P.; Fonarow, G.C.; et al. The ORBIT bleeding score: a simple bedside score to assess bleeding risk in atrial fibrillation. *Eur Heart J* **2015**, *36*, 3258–3264, doi:10.1093/eurheartj/ehv476.
4. Gage, B.F.; Yan, Y.; Milligan, P.E.; Waterman, A.D.; Culverhouse, R.; Rich, M.W.; Radford, M.J. Clinical classification schemes for predicting hemorrhage: results from the National Registry of Atrial Fibrillation (NRAF). *Am Heart J* **2006**, *151*, 713–719, doi:10.1016/j.ahj.2005.04.017.
5. Fang, M.C.; Go, A.S.; Chang, Y.; Borowsky, L.H.; Pomernacki, N.K.; Udaltsova, N.; Singer, D.E. A new risk scheme to predict warfarin-associated hemorrhage: The ATRIA (Anticoagulation and Risk Factors in Atrial Fibrillation) Study. *J Am Coll Cardiol* **2011**, *58*, 395–401, doi:10.1016/j.jacc.2011.03.031.
